# Supplementary material for: MoS 2 -functionalized chitosan hydrogel with antibacterial and antioxidant functions promotes healing of infected diabetic wounds
Source: Royal Society of Chemistry journal article supplement (doi:10.1039/d4qm00562g), 2024-01-01
Supplement: d4qm00562g1.pdf [file d4qm00562g1.pdf]

## **MoS<sub>2</sub>-Functionalized Chitosan Hydrogel with Antibacterial and Antioxidant Functions Promotes Healing of Infected Diabetic Wounds**

Yingjie He <sup>a,#</sup>, Jiahe Guo <sup>b,c,#</sup>, Hua Li <sup>a</sup>, Jiayi Jiang <sup>a</sup>, Jing Chen <sup>d</sup>, Guichun Yang <sup>a</sup>, Xiaofan Yang <sup>c</sup>, Zhenbing Chen <sup>c,\*</sup>, Cuifen Lu <sup>a,\*</sup>

<sup>a</sup> Hubei Provincial Engineering Center of Performance Chemicals & Ministry-of-Education Key Laboratory for the Synthesis and Application of Organic Functional Molecules, Hubei University, Wuhan 430062, China.

E-mail: [lucf@hubu.edu.cn](mailto:lucf@hubu.edu.cn)

<sup>b</sup> Department of Plastic Surgery and Regenerative Medicine, Fujian Medical University Union Hospital, Fuzhou, 350001, China.

<sup>c</sup> Department of Hand Surgery, Union Hospital, Tongji Medical College, Huazhong University of Science and Technology, Wuhan 430022, China

E-mail: [zbchen@hust.edu.cn](mailto:zbchen@hust.edu.cn)

<sup>d</sup> Department of Dermatology, Wuhan No.1 Hospital Wuhan 430000, China

# These authors contributed equally to this work.

\* Corresponding authors.

**Table S1.** Parameters of MoS<sub>2</sub>@Gel hydrogel samples.

| Molar ratio of CHO/NH <sub>2</sub> (R) <sup>a</sup> | Mass of CHO and CS-MoS <sub>2</sub> (mg) |                     | Solid content (S) [wt%] | Sample <sup>b</sup>                   |
|-----------------------------------------------------|------------------------------------------|---------------------|-------------------------|---------------------------------------|
|                                                     | CHO                                      | CS-MoS <sub>2</sub> |                         |                                       |
| 0.2                                                 | 12.6                                     | 7.4                 | 5                       | MoS <sub>2</sub> @Gel (R=0.2, S=5)    |
| 0.5                                                 | 16.2                                     | 3.8                 |                         | MoS <sub>2</sub> @Gel (R=0.5, S=5 )   |
| 1.0                                                 | 17.9                                     | 2.1                 |                         | MoS <sub>2</sub> @Gel (R=1.0, S=5)    |
| 0.2                                                 | 18.9                                     | 11.1                | 7.5                     | MoS <sub>2</sub> @Gel (R=0.2, S=7.5 ) |
| 0.5                                                 | 24.3                                     | 5.7                 |                         | MoS <sub>2</sub> @Gel (R=0.5, S=7.5)  |
| 1.0                                                 | 26.8                                     | 3.2                 |                         | MoS <sub>2</sub> @Gel (R=1.0,S=7.5 )  |
| 0.2                                                 | 25.2                                     | 14.8                | 10                      | MoS <sub>2</sub> @Gel (R=0.2, S=10)   |
| 0.5                                                 | 32.4                                     | 7.6                 |                         | MoS <sub>2</sub> @Gel (R=0.5, S=10)   |
| 1.0                                                 | 35.8                                     | 4.2                 |                         | MoS <sub>2</sub> @Gel (R=1.0, S=10)   |

a. Molar ratio of CHO/NH<sub>2</sub> was calculated based on <sup>1</sup>H NMR of POSS-PEG-CHO and CS-MoS<sub>2</sub>, there are 0.47 mmol CHO in 1 g POSS-PEG-CHO and 4.0 mmol NH<sub>2</sub> in 1 g CS-MoS<sub>2</sub>. b. The hydrogels with MoS<sub>2</sub> concentration of 1.0 mg/mL were selected for physicochemical characterization.

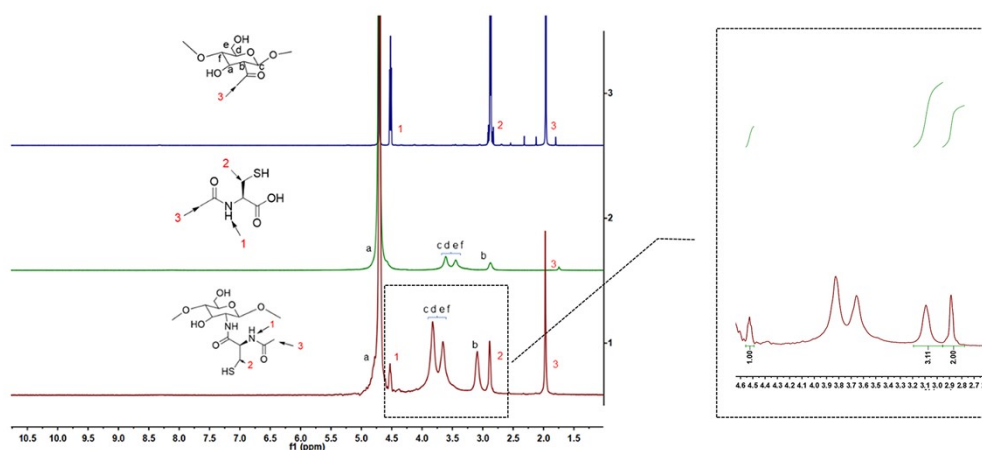

**Figure S1.**  $^1\text{H}$  NMR spectra of NAC-CS and its precursors.

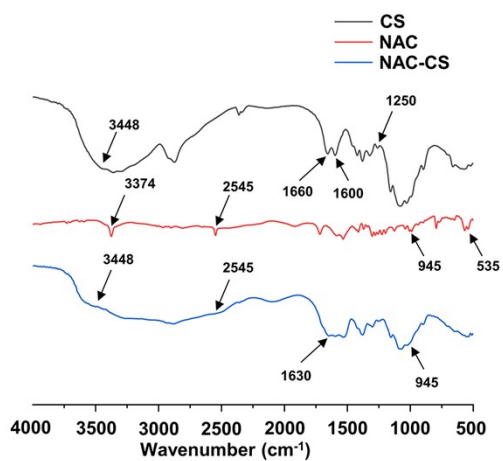

**Figure S2.** FTIR spectra of NAC-CS and its precursors.

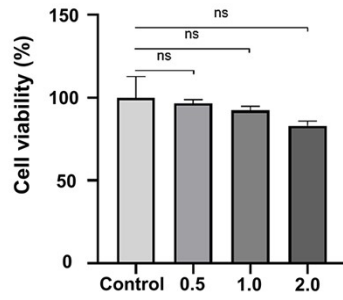

**Figure S3.** Cell viability at different nanosheet concentrations.

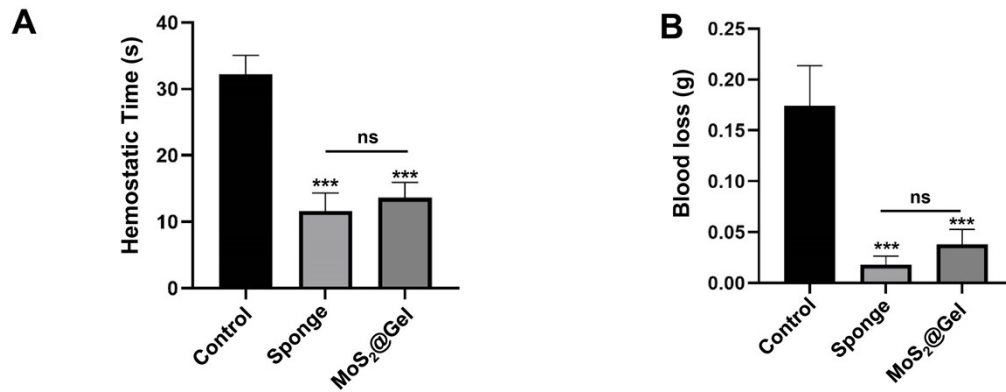

**Figure S4:** (A) Hemostasis time statistics. (B) Blood loss statistics. Error bars indicated means  $\pm$  SD.\*\*\* $p < 0.005$ .

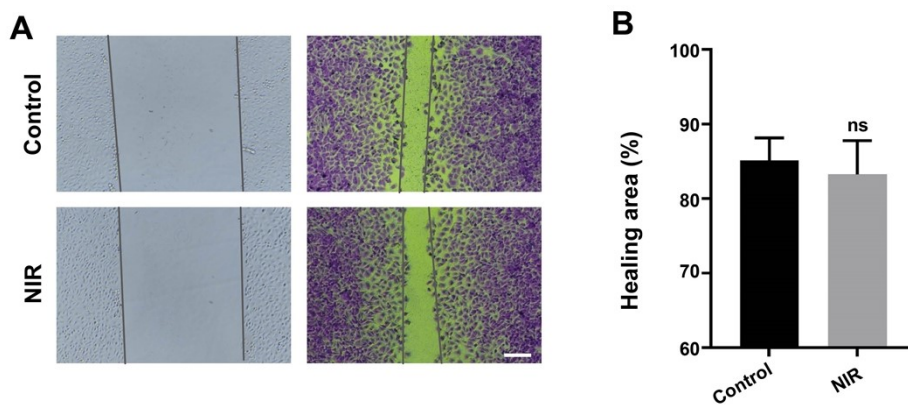

**Figure S5:** (A) Cell migration image under NIR (or Natural light) illumination (The Scale bar: 50  $\mu$ m). (B) Statistical analysis of Cell migration under NIR (or Natural light) illumination.

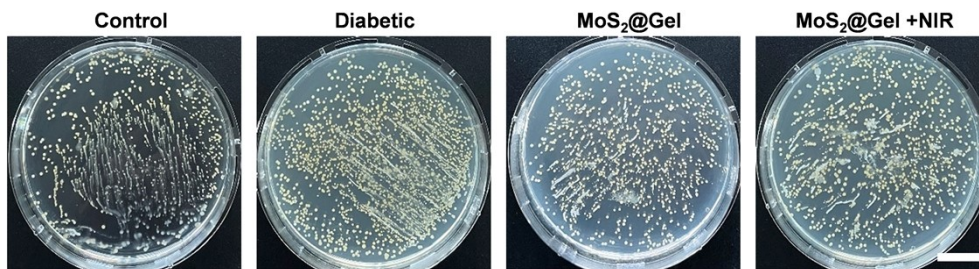

**Figure S6:** Bacterial plate images of mouse wounds (The Scale bar: 10 mm).

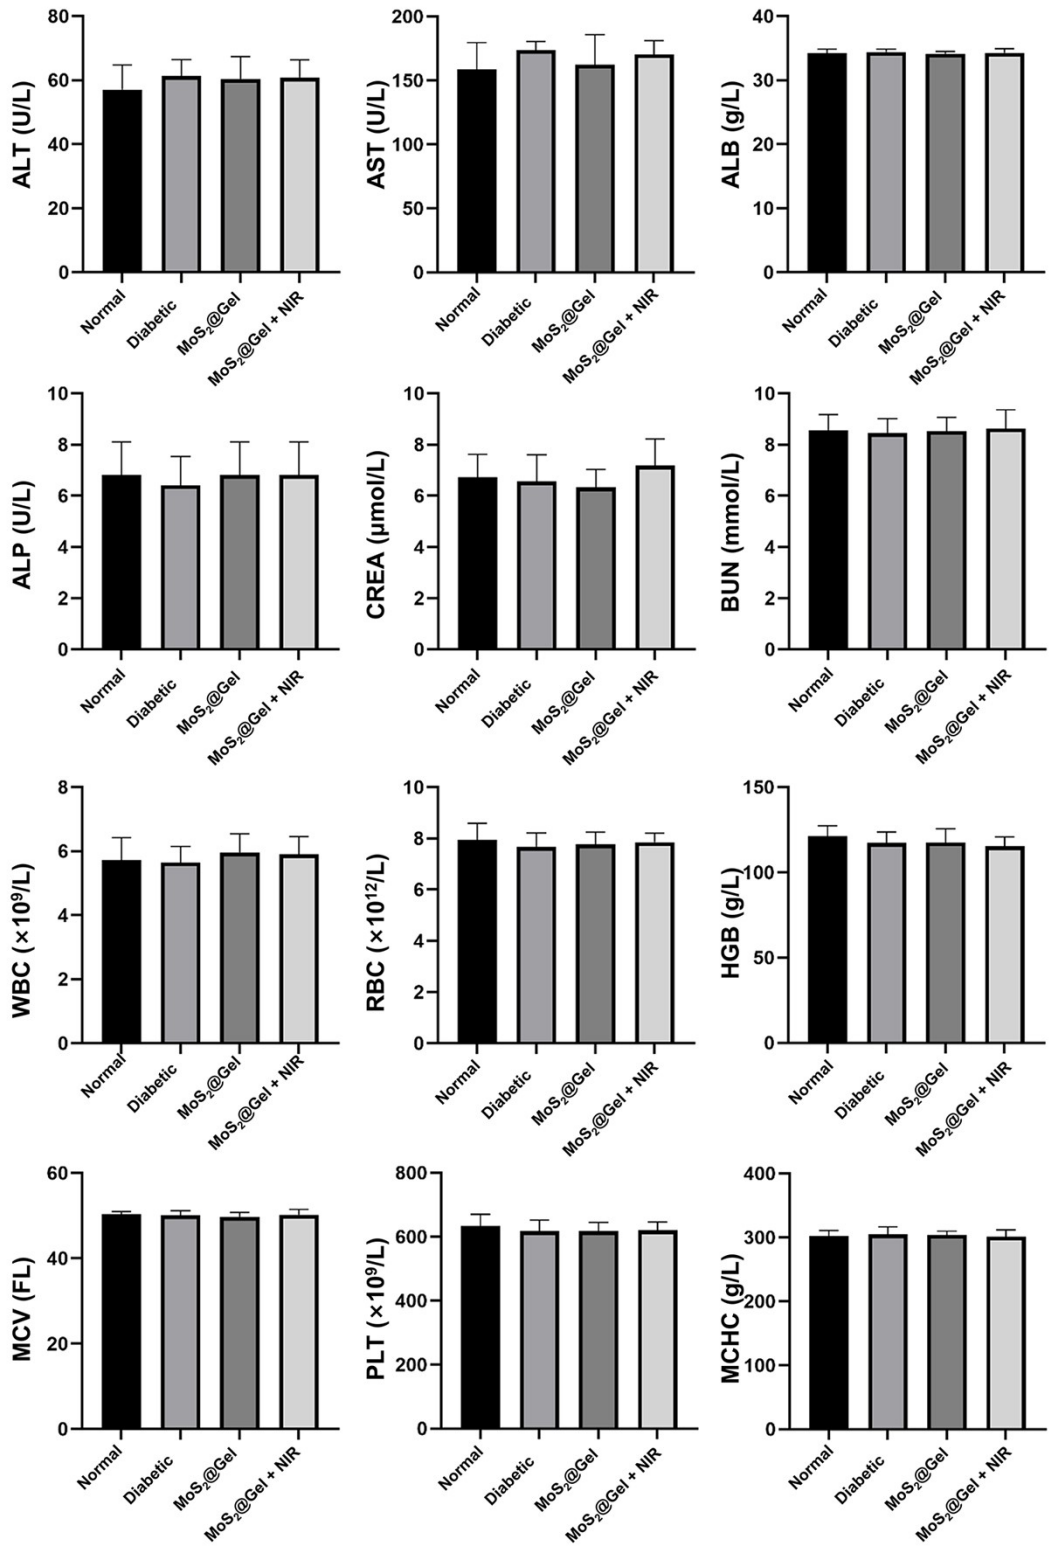

Figure S7. Mouse blood sample analysis.

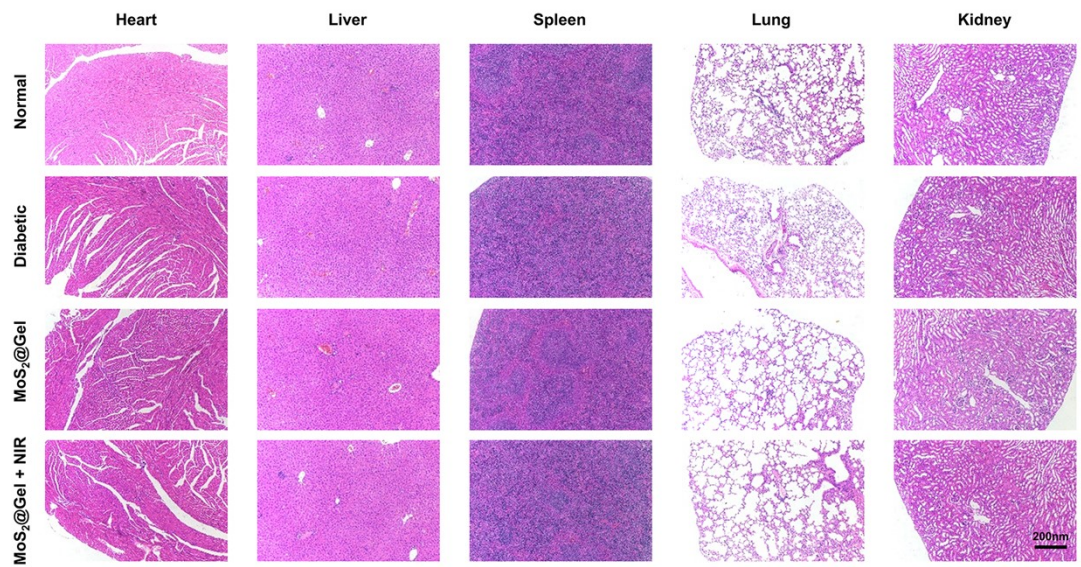

**Figure S8.** H&E staining results for main organs.
